# Supplementary material for: Characterization of the charge transfer luminescence of the [WO6]6− octahedron in Ca3WO6 and the [WO5]4− square pyramid in Ca3WO5Cl2
Source: Royal Society of Chemistry journal article supplement (doi:10.1039/d2cp02753d), 2022-01-01
Supplement: d2cp02753d3.pdf [file d2cp02753d3.pdf]

## Electronic Supplementary Information

### Characterization of charge transfer luminescence for $[\text{WO}_6]^{6-}$ octahedron in $\text{Ca}_3\text{WO}_6$ and $[\text{WO}_5]^{4-}$ square pyramid in $\text{Ca}_3\text{WO}_5\text{Cl}_2$

*Yuuki Kitagawa,<sup>a\*</sup> Shota Takemura,<sup>b</sup> Daigorou Hirai,<sup>c</sup> Zenji Hiroi,<sup>c</sup> Jumpei Ueda,<sup>a</sup> Setsuhisa Tanabe<sup>a</sup>*

<sup>a</sup> Graduate School of Human and Environmental Studies, Kyoto University, Sakyo-ku, Kyoto 606-8501, Japan.

<sup>b</sup> Luminescent Materials Group, National Institute for Materials Science, Tsukuba, Ibaraki 305-0044, Japan.

<sup>c</sup> Institute for Solid State Physics, University of Tokyo, Kashiwa, Chiba 277-8581, Japan.

Email

Y. Kitagawa: [kitagawa.yuuki@aist.go.jp](mailto:kitagawa.yuuki@aist.go.jp)

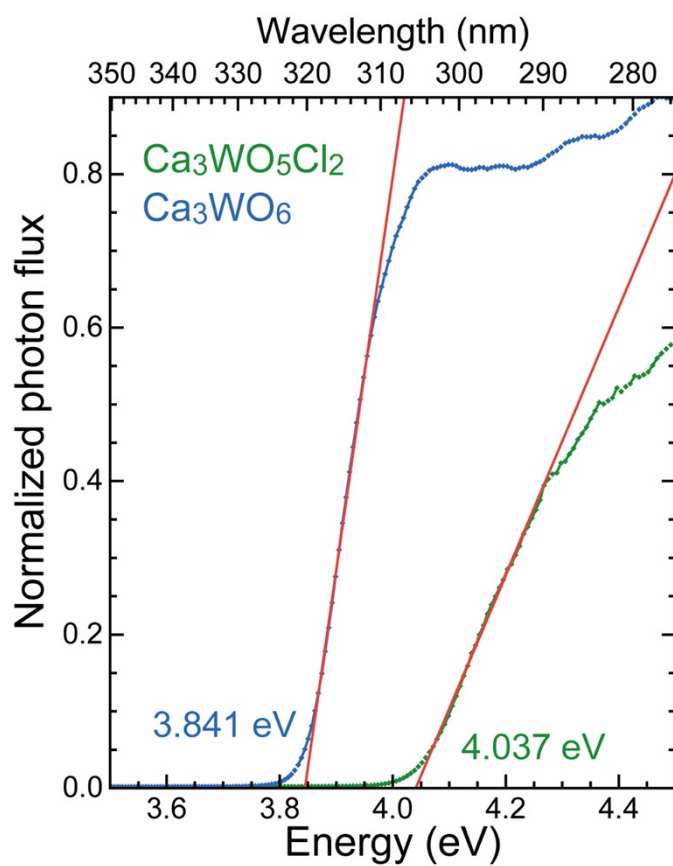

**Fig. S1** Linear fitting for the absorption edge of the PLE spectra at 4 K.

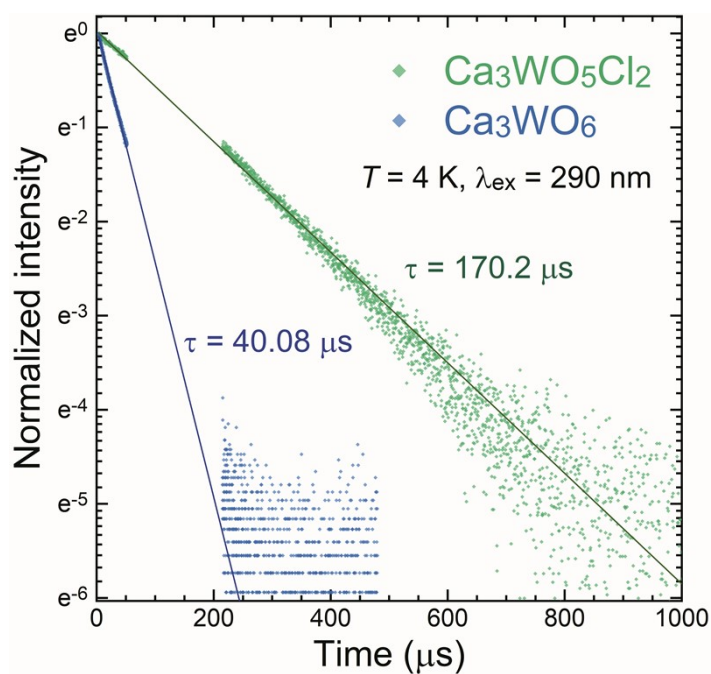

**Fig. S2** Luminescence decay curves of the single-crystal samples, measured at 4 K. Data in the range of 50–200 ns is missing due to a problem with the measurement setup.

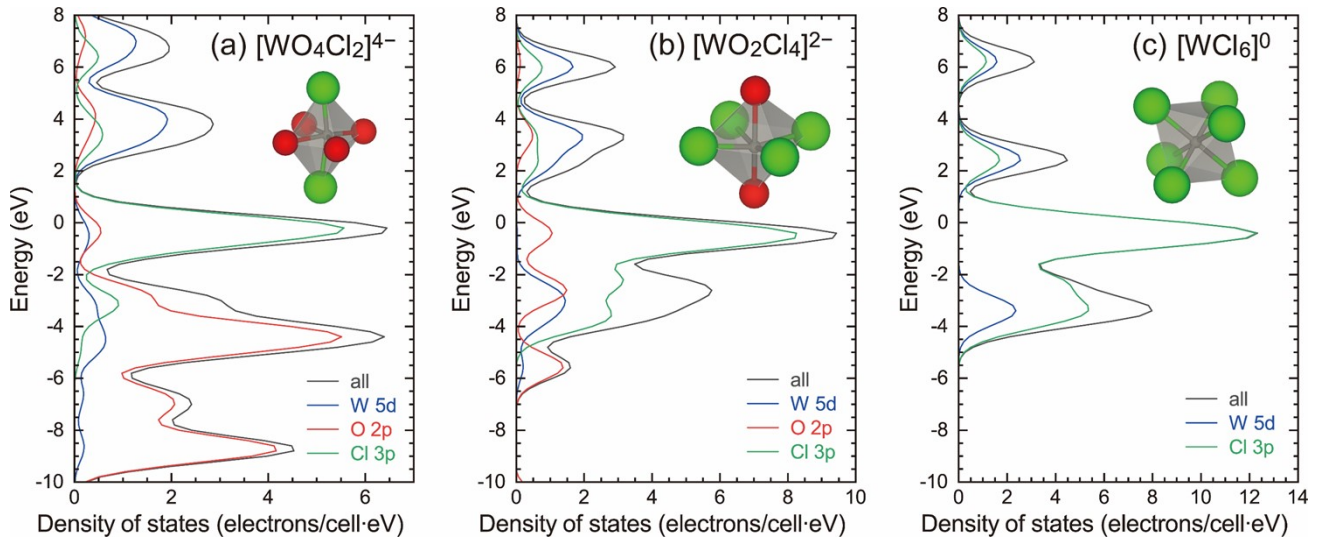

**Fig. S3** Total and partial density of electronic states for (a) a  $[\text{WO}_4\text{Cl}_2]^{4-}$  cluster in  $\text{WO}_2\text{Cl}_2$  (ICSD 28510), (b) a  $[\text{WO}_2\text{Cl}_4]^{2-}$  cluster in  $\text{WOCl}_4$  (ICSD 25519), and (c) a  $[\text{WCl}_6]$  cluster in  $\text{WCl}_6$  (ICSD 425147), which were calculated by the relativistic DV- $X\alpha$  method. The HOMO mainly composed of Cl 3p orbitals is set at 0 eV.

**Table S1** Lattice constants and interatomic distances between  $\text{W}^{6+}$  and ligands before and after DFT geometry optimization

|                      | $\text{Ca}_3\text{WO}_5\text{Cl}_2$ ( $Pbnm$ ) |                           | $\text{Ca}_3\text{WO}_6$ ( $P2_1/n$ ) |                          |                       |
|----------------------|------------------------------------------------|---------------------------|---------------------------------------|--------------------------|-----------------------|
|                      | CIF                                            | Optimized                 | CIF                                   | Optimized                |                       |
| lattice constants    | $a = 11.820(2) \text{ \AA}$                    | $a = 11.8007 \text{ \AA}$ | $a = 5.5518(3) \text{ \AA}$           | $a = 5.5065 \text{ \AA}$ |                       |
|                      | $b = 11.132(1) \text{ \AA}$                    | $b = 11.0789 \text{ \AA}$ | $b = 5.8100(3) \text{ \AA}$           | $b = 5.7905 \text{ \AA}$ |                       |
|                      | $c = 5.587(1) \text{ \AA}$                     | $c = 5.5574 \text{ \AA}$  | $c = 8.0066(4) \text{ \AA}$           | $c = 7.9640 \text{ \AA}$ |                       |
|                      |                                                |                           | $\beta = 89.808(1)^\circ$             | $\beta = 90.1846^\circ$  |                       |
| bonding <sup>a</sup> | $\text{W}^{6+}\text{-O}^{2-}_{\text{I}}$       | 1.724(15) $\text{ \AA}$   | 1.73113 $\text{ \AA}$                 | 1.9273(7) $\text{ \AA}$  | 1.93016 $\text{ \AA}$ |
|                      | $\text{W}^{6+}\text{-O}^{2-}_{\text{II}}$      | 1.887(11) $\text{ \AA}$   | 1.88707 $\text{ \AA}$                 | 1.9134(6) $\text{ \AA}$  | 1.90982 $\text{ \AA}$ |
|                      | $\text{W}^{6+}\text{-O}^{2-}_{\text{III}}$     | 1.911(11) $\text{ \AA}$   | 1.90258 $\text{ \AA}$                 | 1.9358(8) $\text{ \AA}$  | 1.92416 $\text{ \AA}$ |
|                      | $\text{W}^{6+}\text{-Cl}^-$                    | 3.404(8) $\text{ \AA}$    | 3.26617 $\text{ \AA}$                 | —                        | —                     |

<sup>a</sup>The different  $\text{O}^{2-}$  ions are labeled with Roman numerals, I–III, shown in Fig. 1.

**Table S2** Results of compositional analysis of MO levels calculated by the relativistic DV- $X\alpha$  calculation (unit: %)<sup>a</sup>

|       | top1 <sup>b</sup> | top2 <sup>b</sup> | top4 <sup>b</sup> | 5d <sub>1</sub> | 5d <sub>2</sub> | 5d <sub>3</sub> | 5d <sub>4</sub> | 5d <sub>5</sub> |
|-------|-------------------|-------------------|-------------------|-----------------|-----------------|-----------------|-----------------|-----------------|
| W 5d  | 0.04              | 0.03              | 0.01              | 80.00           | 68.67           | 71.08           | 49.95           | 70.68           |
| O 2p  | 11.14             | 17.59             | 14.10             | 19.88           | 29.07           | 26.63           | 23.53           | 25.95           |
| Cl 3p | 88.57             | 82.21             | 85.19             | 0.00            | 0.04            | 0.02            | 1.22            | 0.00            |

<sup>a</sup>Note that the total percentages are less than 100% because of small contributions of other orbitals, such as O 2s, W 6s, and W 6p orbitals.

<sup>b</sup>The first, second, and fourth levels of the HOMO level are labeled top1, top2, and top4, respectively, in order of decreasing energy, mainly composed of the Cl 3p<sub>x</sub>, 3p<sub>y</sub>, and 3p<sub>z</sub> orbitals.

### Confirmation of k-points convergence

In order to confirm the validity of these k-points grids, the DFT single-point SCF calculations with the double k-points grids (2×2×4 for Ca<sub>3</sub>WO<sub>5</sub>Cl<sub>2</sub> and 6×6×4 for Ca<sub>3</sub>WO<sub>6</sub>) were performed with the CASTEP module. The results are summarized in Table S3. Because the total energies are well converged even with smaller k-points mesh, the smaller k-points grids (1×1×3 for Ca<sub>3</sub>WO<sub>5</sub>Cl<sub>2</sub> and 3×3×2 for Ca<sub>3</sub>WO<sub>6</sub>) are enough for the property calculations.

**Table S3.** Comparison of the SCF converged energy with different sizes of k-point grids

|                           | Ca <sub>3</sub> WO <sub>5</sub> Cl <sub>2</sub> |             | Ca <sub>3</sub> WO <sub>6</sub> |             |
|---------------------------|-------------------------------------------------|-------------|---------------------------------|-------------|
|                           | 1×1×3                                           | 2×2×6       | 3×3×2                           | 6×6×4       |
| SCF converged energy (eV) | -33652.0430                                     | -33652.0192 | -15917.9952                     | -15917.9203 |
